# Supplementary material
Source: publisher figshare collection journal article supplement (https://brill.figshare.com/ndownloader/files/13395461)
Supplement: Supplementary file 1 [file 13395461]

## Sheet: TableModern
Collection N°	Species	Origin	Sex	Age	SVL (in mm)	TL	Weight (in gr)
MNHN-ZA-AC 1874-262	Varanus bengalensis
MNHN-ZA-AC 1883-1828	Varanus bengalensis
MNHN-ZA-AC 1886-634	Varanus bengalensis
MNHN-ZA-AC 1886-649	Varanus bengalensis
UF 172497	Varanus bengalensis	Malaysia	female	4 years old	353
UF 34753	Varanus bengalensis	Malaysia
UF 39074	Varanus bengalensis		female		275
UF 40384	Varanus bengalensis	Malaysia	male	adult
UF 40385	Varanus bengalensis	Thailand		0.5-1 year old	258
UF 40386	Varanus bengalensis	Thailand
UF 40387	Varanus bengalensis	Thailand		6 month-1 year old
UF 40767	Varanus bengalensis	Thailand			280	750
UF 40770	Varanus bengalensis	Thailand
UF 41165	Varanus bengalensis				310	805
UF 41166	Varanus bengalensis				285	760
UF 41630	Varanus bengalensis	Thailand
UF 42323	Varanus bengalensis	Thailand
UF 42470	Varanus bengalensis				300	757
UF 42514	Varanus bengalensis		male		270
UF 44533	Varanus bengalensis	Thailand
UF 45203	Varanus bengalensis	Malaysia		4 years old?
UF 56075	Varanus bengalensis		male		265	670	200
UF 56076	Varanus bengalensis				260	685	180
UF 56285	Varanus bengalensis	Malaysia	male	8 years old	475
UF 56900	Varanus bengalensis		male		340
UF 57143	Varanus bengalensis		male		265	620	250
UF 61022	Varanus bengalensis	India			105
UF 61716	Varanus bengalensis	Thailand			170
UF 71709	Varanus bengalensis				185	470	55
UF 72476	Varanus bengalensis				157	390	40
UF 76528	Varanus bengalensis
UF 76529	Varanus bengalensis				508
UF 99302	Varanus bengalensis		female		173	413
UF 99414	Varanus bengalensis				177	398
UF 99785	Varanus bengalensis	India			167	412
MNHN-ZA-AC 1973-108	Varanus dumerilii
UF 37279	Varanus dumerilii	Malaysia
UF 42324	Varanus dumerilii
UF 45210	Varanus dumerilii				400	920
UF 45211	Varanus dumerilii				360	830
UF 45212	Varanus dumerilii		male		460	1080
UF 50260	Varanus dumerilii
UF 52000	Varanus dumerilii
UF 54209	Varanus dumerilii	Thailand	male		440	1080
UF 57009	Varanus dumerilii				225
UF 57022	Varanus dumerilii				510	1220	1950
UF 63821	Varanus dumerilii	Thailand			380	905	350
UF 67716	Varanus dumerilii				450	1107
UF 39646	Varanus rudicollis
UF 45128	Varanus rudicollis		male		270	630
UF 45648	Varanus rudicollis				535	730
UF 61064	Varanus rudicollis
UF 66037	Varanus rudicollis
UF 66049	Varanus rudicollis	Thailand
UF 76332	Varanus rudicollis				437	1100
CU not numbered	Varanus rudicollis
MNHN-ZA-AC 1886-284	Varanus salvator
MNHN-ZA-AC 1886-351	Varanus salvator
MNHN-ZA-AC 1888-198	Varanus salvator
MNHN-ZA-AC 1912-423	Varanus salvator
MNHN-ZA-AC 1977-047	Varanus salvator
MNHN-ZA-AC 1978-511	Varanus salvator
PMJ Rept. 1283	Varanus salvator
PMJ Rept. 393	Varanus salvator
PMJ Rept. 453	Varanus salvator
PMJ Rept. 455	Varanus salvator
PMJ Rept. 596	Varanus salvator
UF 33161	Varanus salvator	Malaysia	male		830	1930	10910
UF 42322	Varanus salvator
UF 42686	Varanus salvator
UF 42905	Varanus salvator	Thailand			270	690
UF 42967	Varanus salvator				225	535
UF 42968	Varanus salvator		female		340	880
UF 50999	Varanus salvator	Philippines
UF 53670	Varanus salvator	Philippines			345
UF 54862	Varanus salvator	Philippines			350
UF 54863	Varanus salvator	Philippines			350
UF 54864	Varanus salvator	Philippines			355
UF 55451	Varanus salvator	Philippines					220
UF 55452	Varanus salvator	Philippines					190
UF 55454	Varanus salvator	Philippines					190
UF 56617	Varanus salvator				265
UF 56879	Varanus salvator		male		380	960	680
UF 57014	Varanus salvator	Philippines			350
UF 57018	Varanus salvator				330
UF 61013	Varanus salvator	Philippines
UF 67491	Varanus salvator	Philippines			490	1260
UF 71561	Varanus salvator	Thailand
